# Supplementary material for: Targeting DRP1 with Mdivi-1 to correct mitochondrial abnormalities in ADOA+ syndrome
Source: JCI journal article supplement (doi:10.1172/jci.insight.180582), 2024-06-25

**Full unedited gel for Figure 1D**

**OPA1**

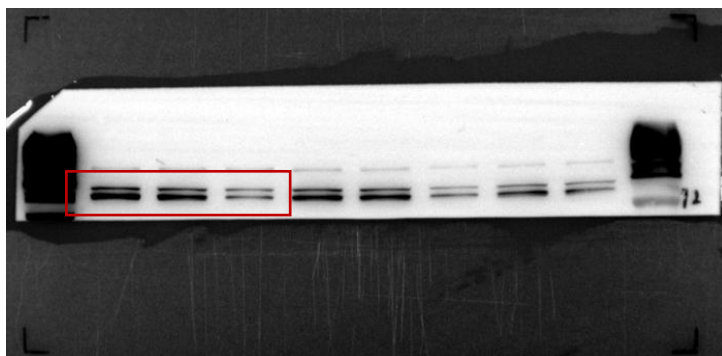

**ACTIN**

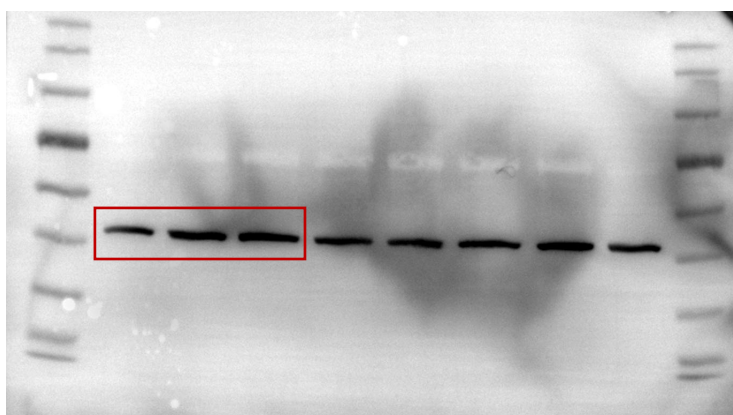

**Full unedited gel for Figure 1G**

**ATP5A UQCRC2 SDHB CO2 NDUFB8**

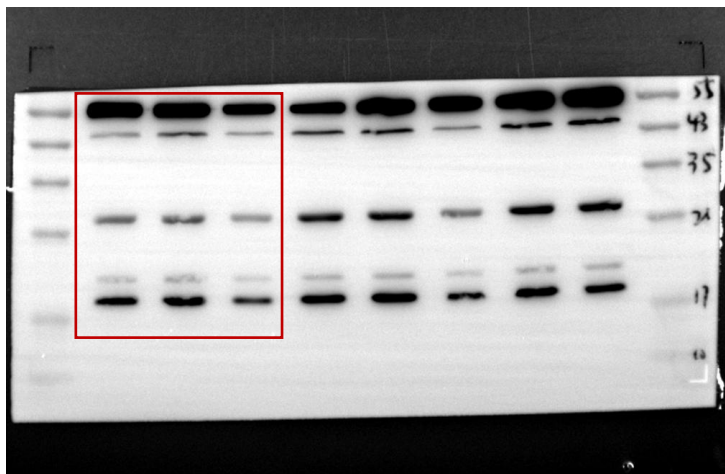

**ACTIN**

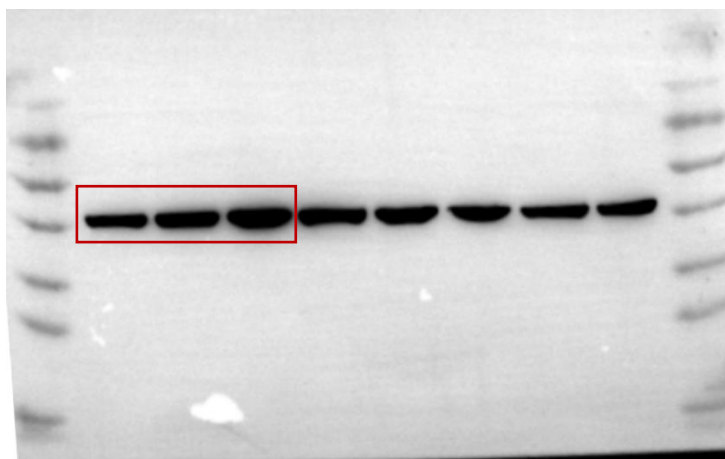

**Full unedited gel for Figure 2**

**ND2**

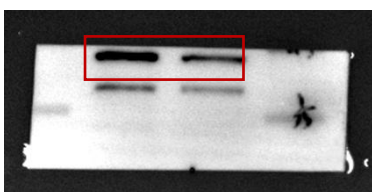

**CYB**

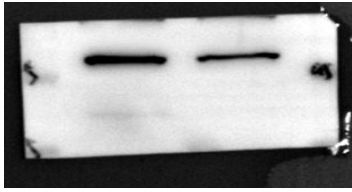

**CO4**

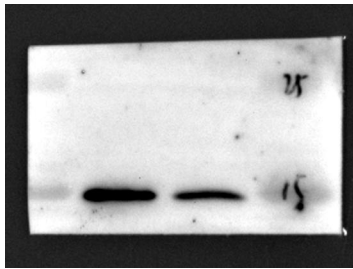

**ACTIN**

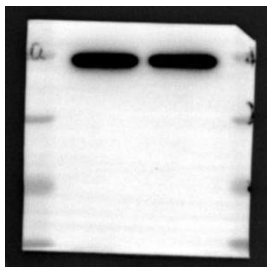

**Full unedited gel for Figure 3B**

**OPA1**

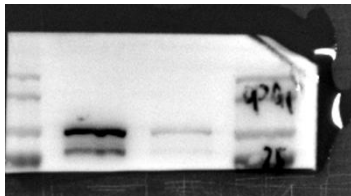

**MFN1**

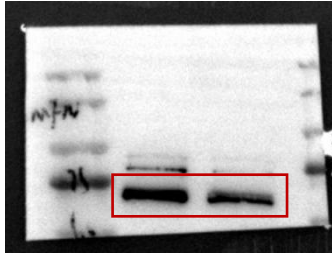

**ACTIN**

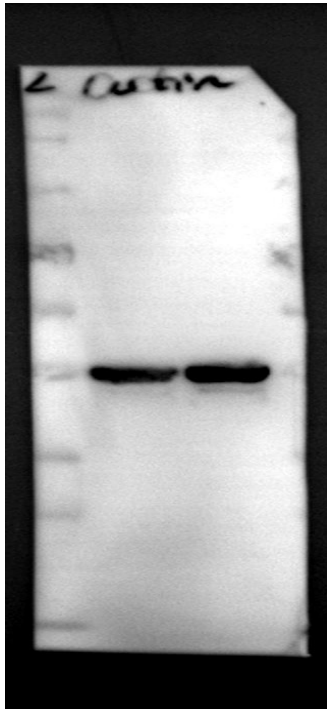

**DRP1**

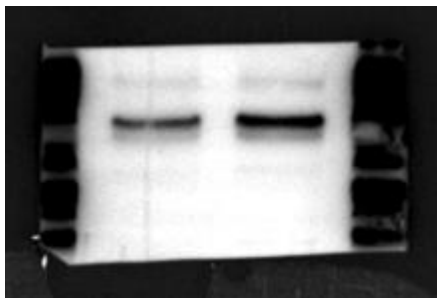

**p-DRP1**

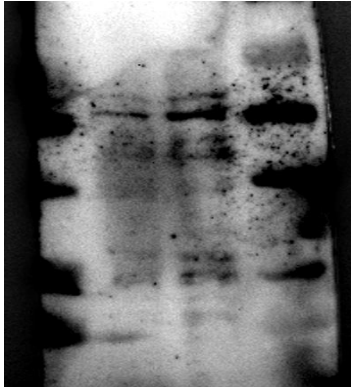

**Full unedited gel for Figure 3C**

**DRP1**

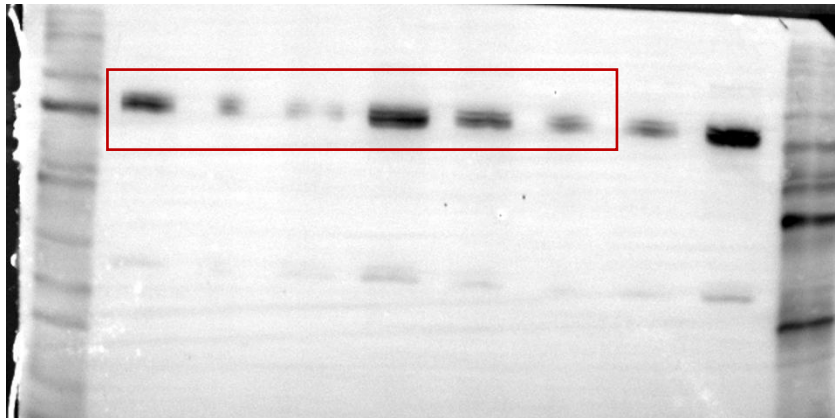

**VDAC1**

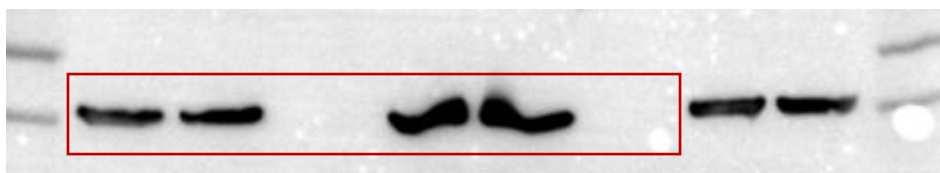

**P-DRP1**

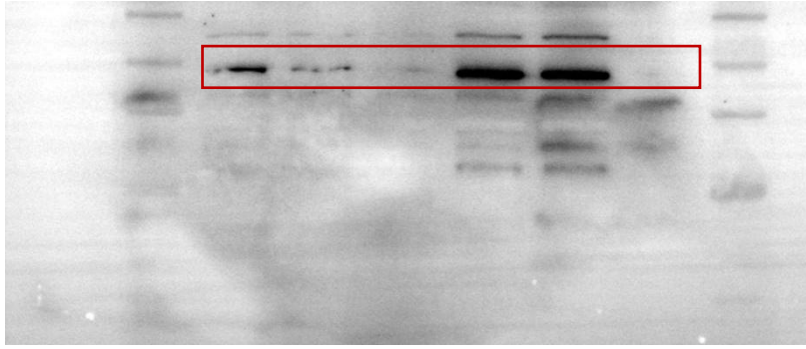

**VDAC1**

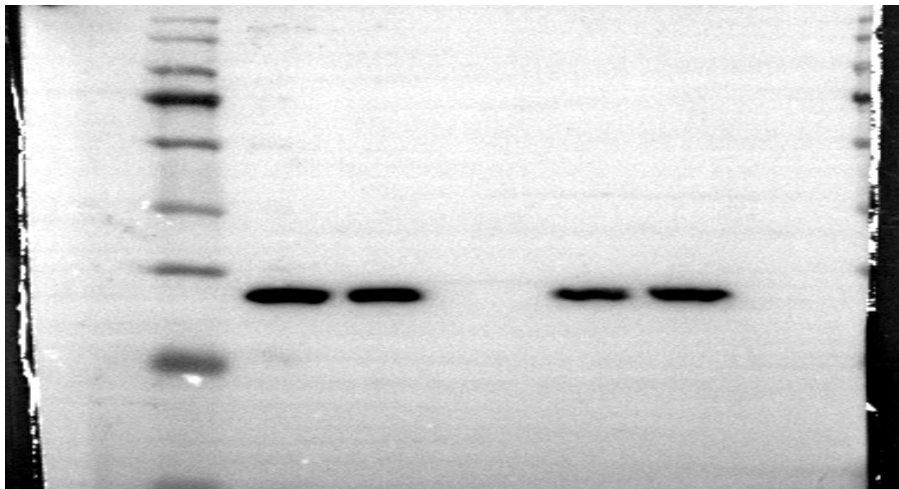

**Full unedited gel for Figure 4A**

**LAMP1**

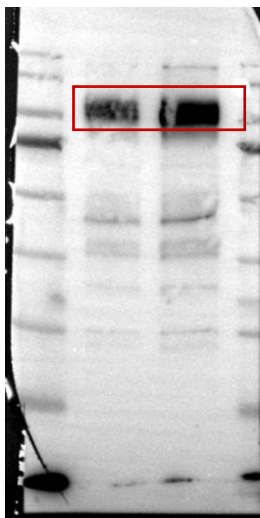

**P62**

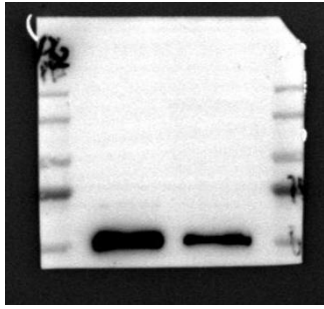

**ACTIN**

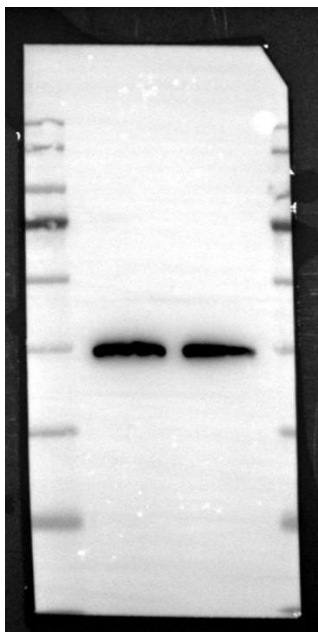

**LC3**

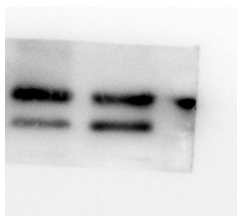

**ACTIN**

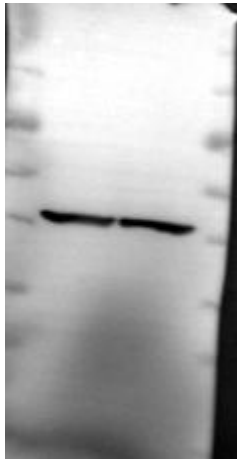

**Full unedited gel for Figure 4B**

**PINK1**

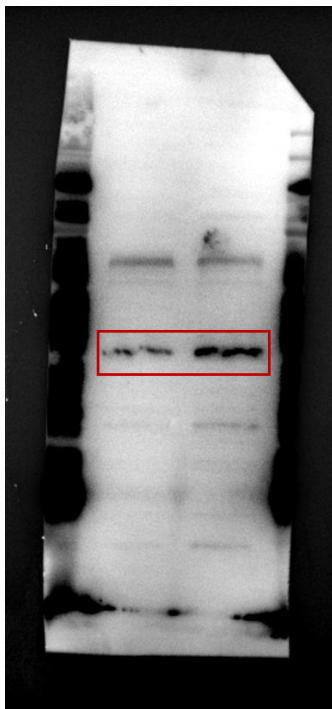



**BNIP3L**

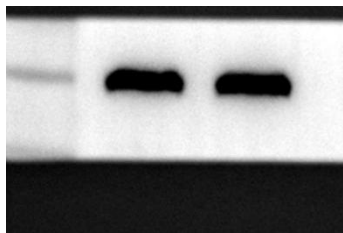

**ACTIN**

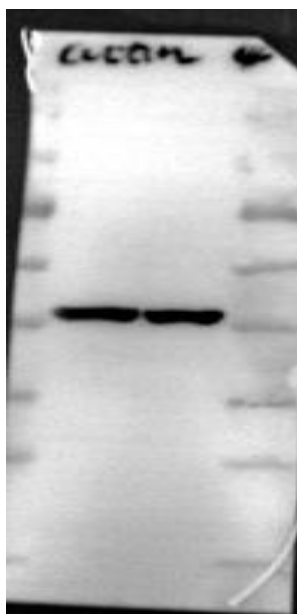

**FUNDC1**

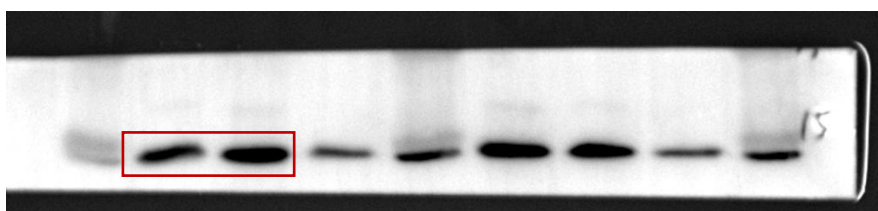

**ACTIN**

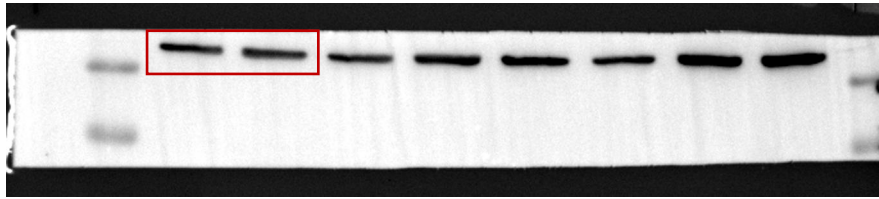

**Full unedited gel for Figure 5A**

**OPA1**

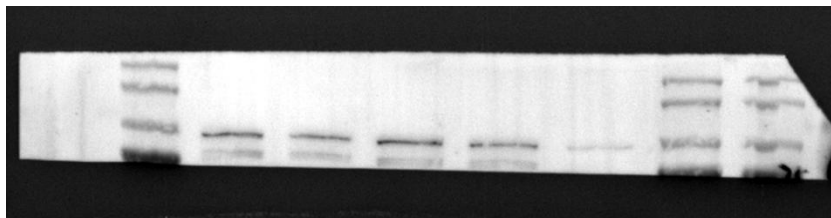

**ACTIN**

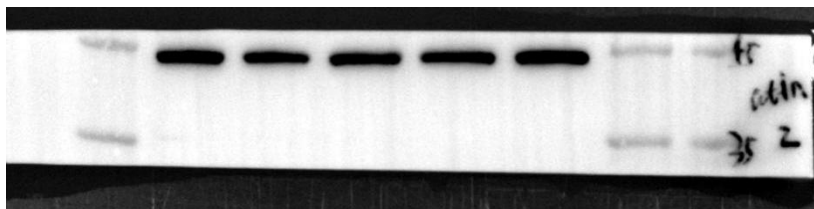

**DRP1**

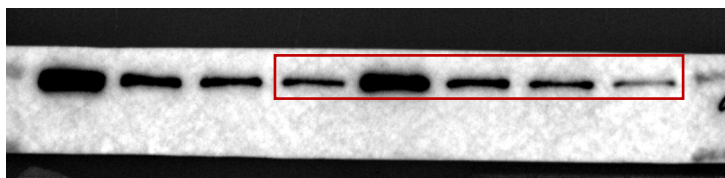

**P-DRP1**

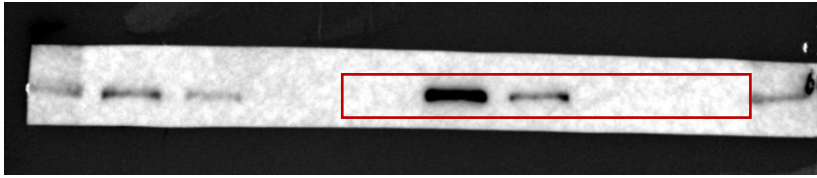

**ACTIN**

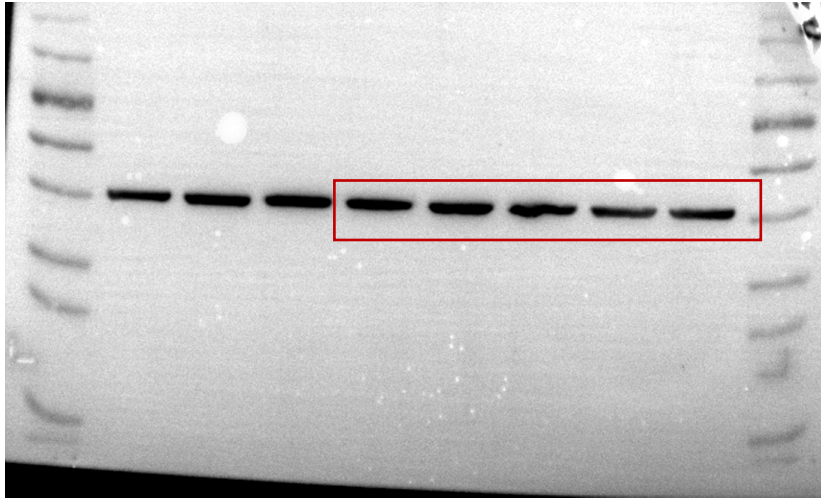

**Full unedited gel for Figure 5D**

**OPA1**

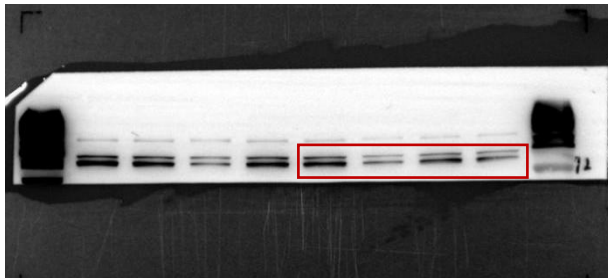

**ACTIN**

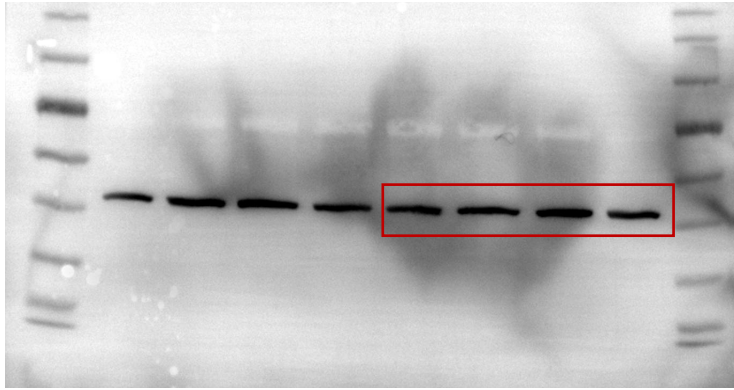

**LC3**

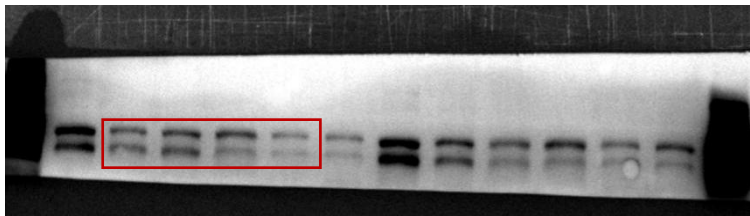

**ACTIN**

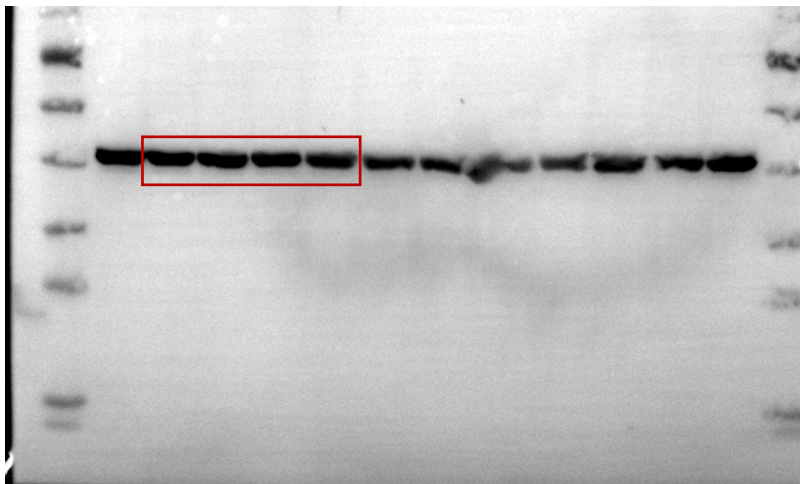

**Full unedited gel for Figure 5E**

**ATP5A UQCRC2 SDHB CO2 NDUFB8**

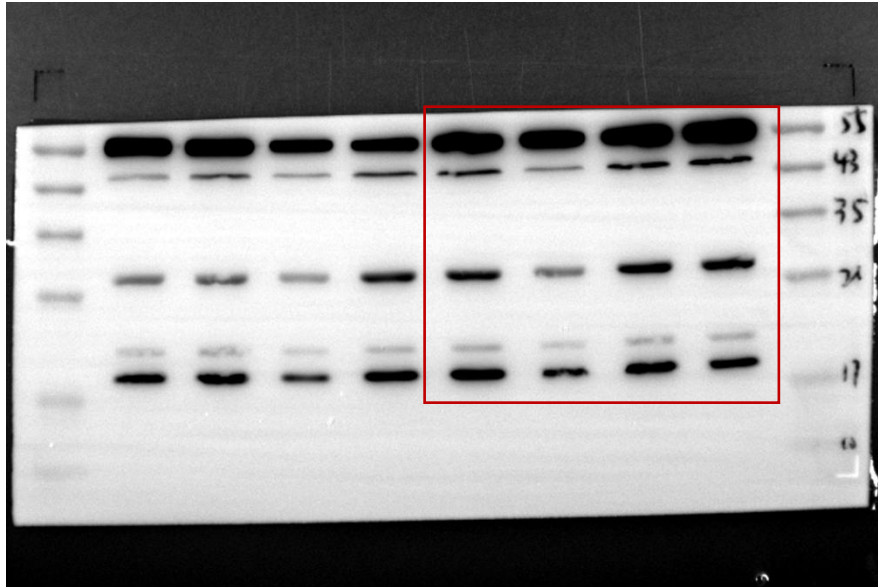

**ACTIN**

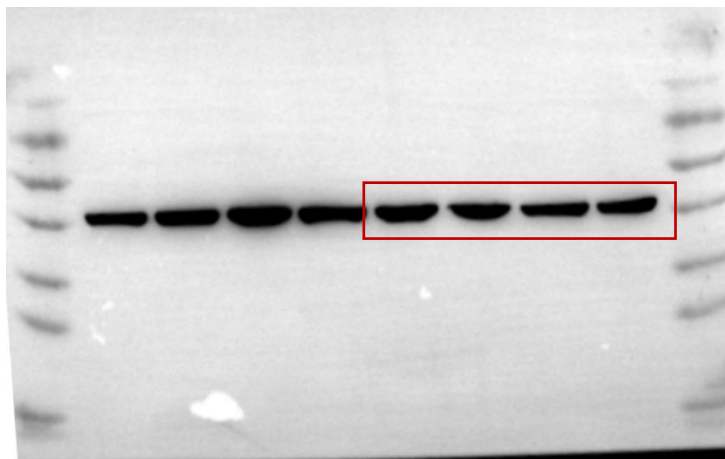

## Full unedited gel for supplement Figure 2A

ND5

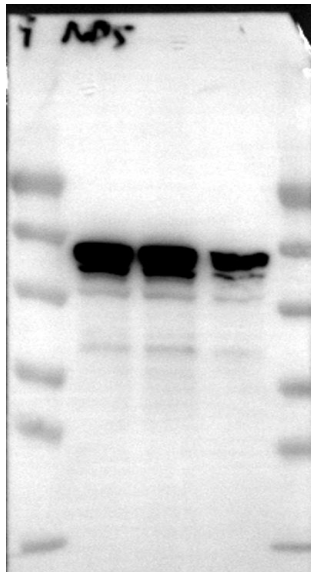

CO3

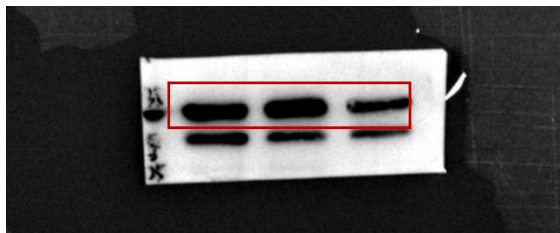

CO4

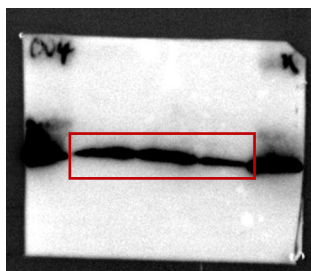

GAPDH

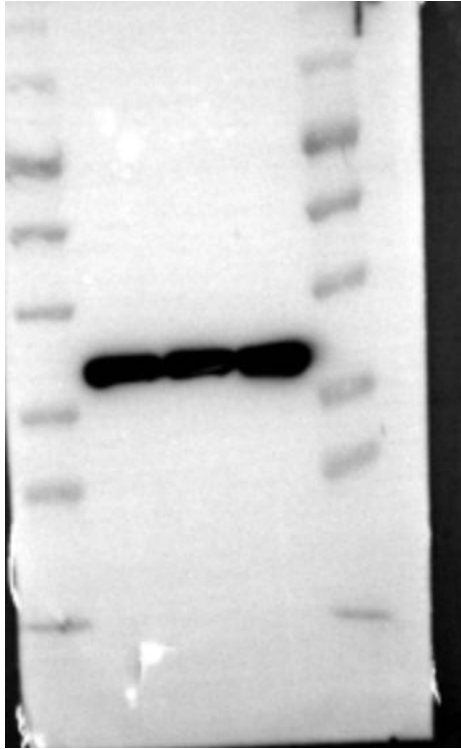

**ND4**

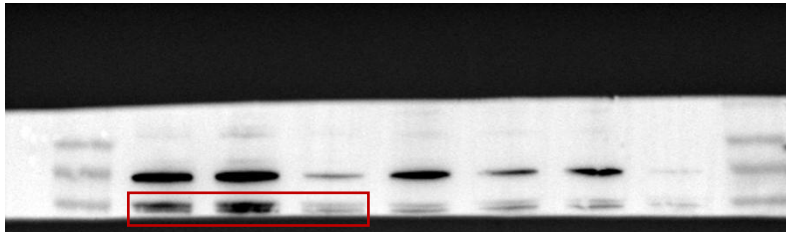

**CYB**

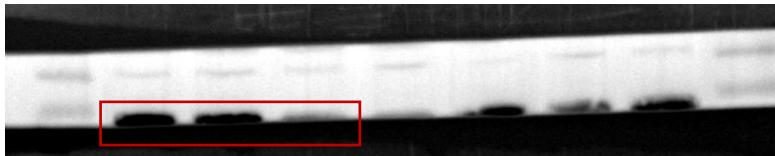

**ATP6**

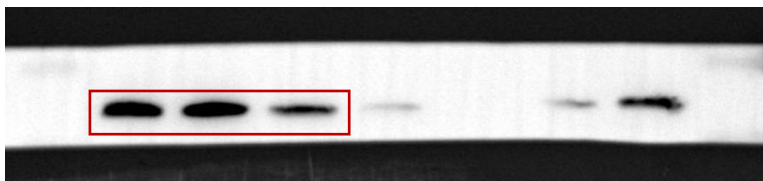

**GAPDH**

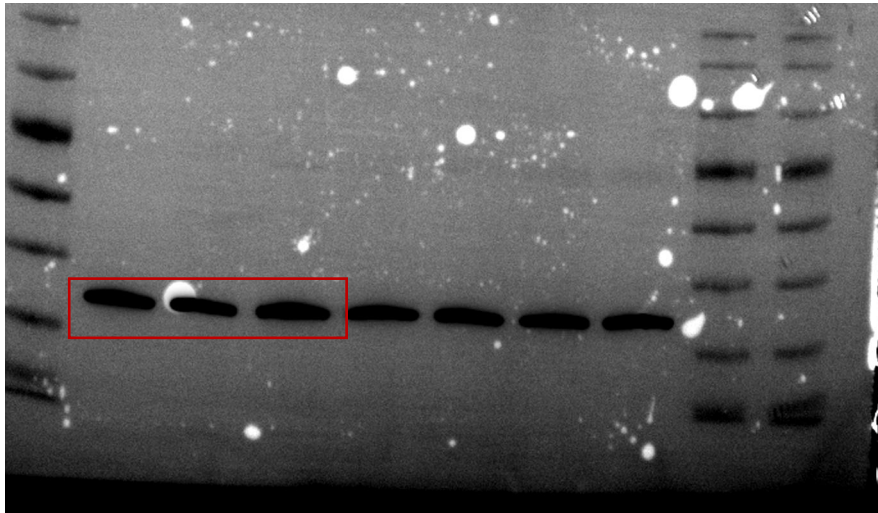

**Full unedited gel for supplement Figure 4A**

**ND4**

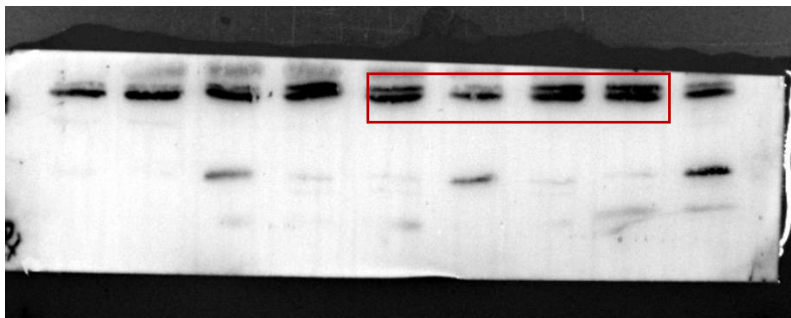

**CYB**

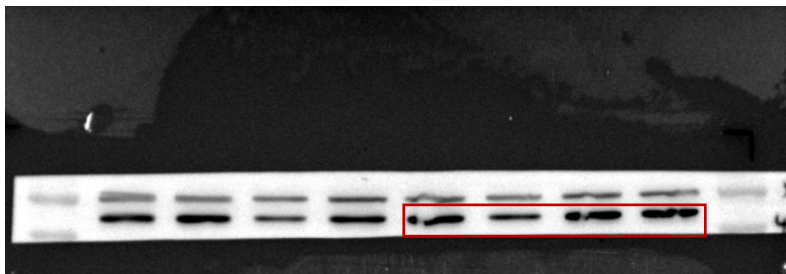



**CO4**

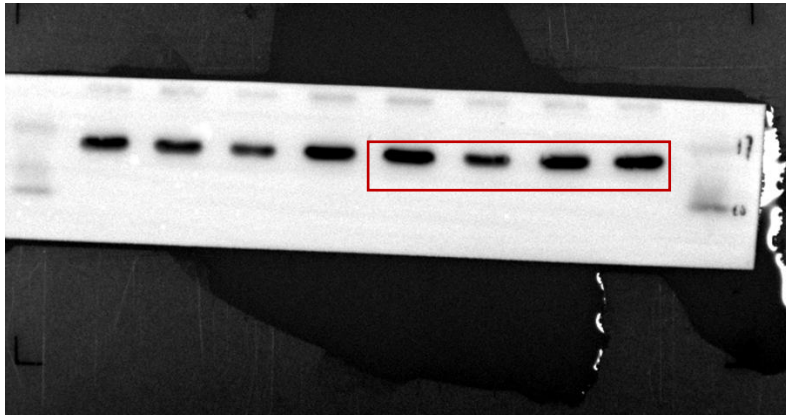

**ATP8**

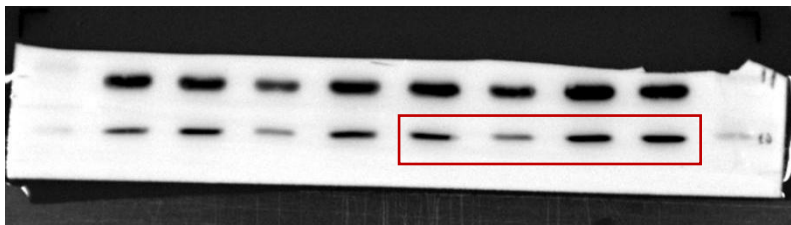

**ACTIN**

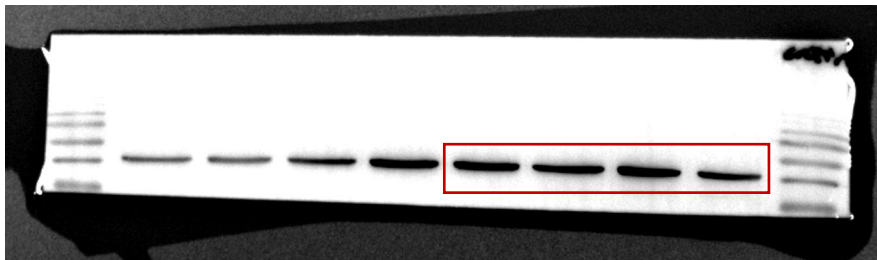

Supplement: sd2 [file 2]
